# Supplementary material
Source: Springer Nature journal article supplement (https://www.springermedizin.de/resource/supplementary/12887_2014_1092_MOESM1_ESM.pdf/9476454)
Supplement: MOESM1 [file 9476454]

# PILOT STUDY

Selecting diabetes-specific situations  
(based on professionals, parents and literature)

Filming situations in 15 families

Describing parent and child behaviors in observation instrument

Scoring the videotapes of these 15 families with the OKI-DO instrument

# SUBSEQUENT STUDY

Filming situation around mealtime in 62 additional families (total sample  $n=77$ ),  
and scoring the families with the OKI-DO instrument

Testing a priori hypotheses with Pearson correlations to evaluate the preliminary  
validity of the observation instrument

More than 90% of the hypotheses have to be confirmed with statistically significant  
correlations or correlations in the predicted direction
